# Supplementary material for: Simultaneous Suppression of Multiple Programmed Cell Death Pathways by miRNA-105 in Cardiac Ischemic Injury
Source: PubMed Central journal article supplement (PMC6369328; doi:10.1016/j.omtn.2018.12.015), 2019-01-10
Supplement: mmc1.pdf [file mmc1.pdf]

**OMTN, Volume 14**

**Supplemental Information**

**Simultaneous Suppression of Multiple**

**Programmed Cell Death Pathways**

**by miRNA-105 in Cardiac Ischemic Injury**

**Sunhye Shin, Jung-Won Choi, Hanbyeol Moon, Chang Youn Lee, Jun-Hee Park, Jiyun Lee, Hyang-Hee Seo, Gyoonhee Han, Soyeon Lim, Seahyoung Lee, Sang Woo Kim, and Ki-Chul Hwang**

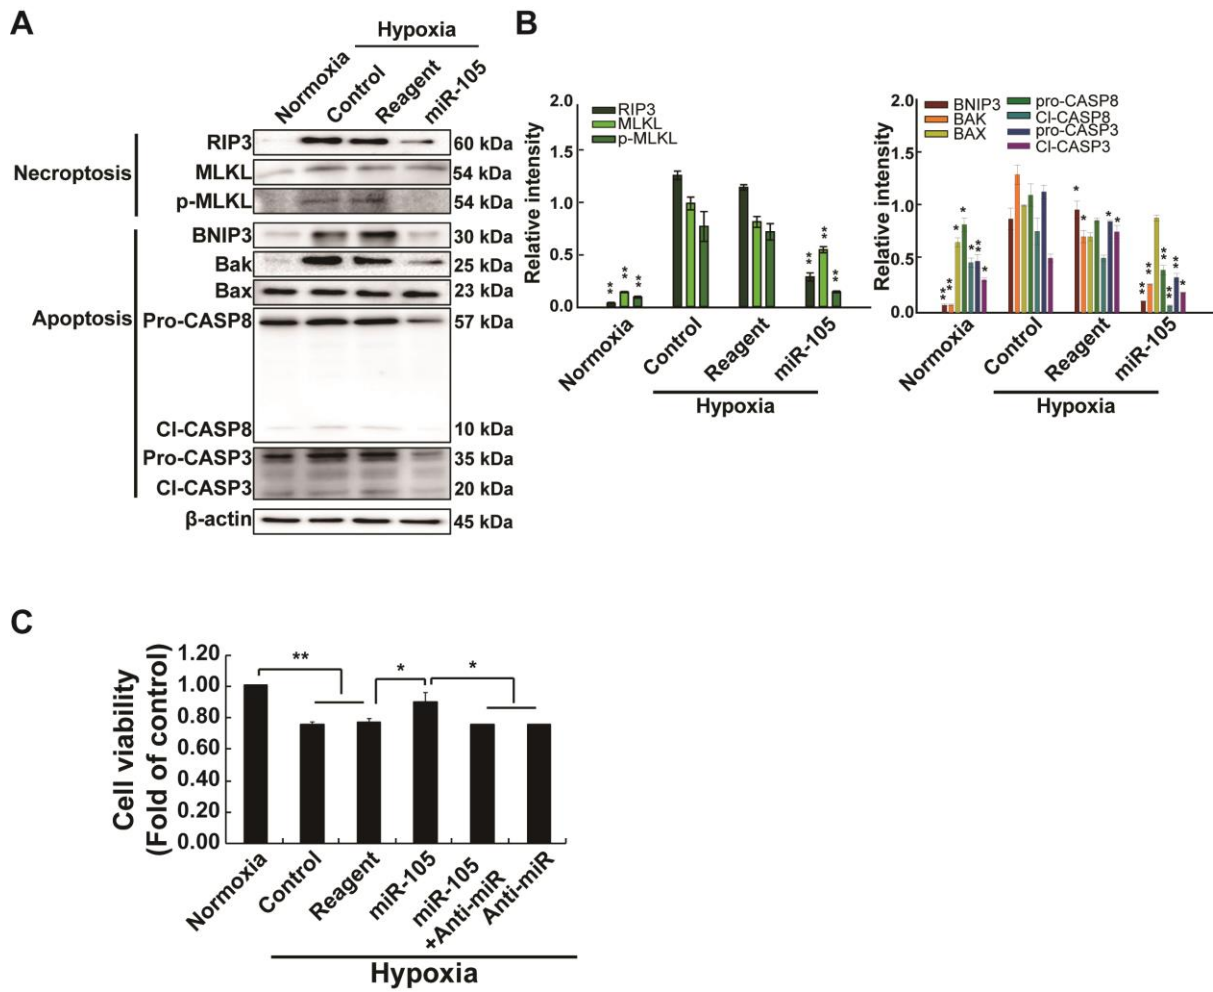

**Supplementary Figure S1. Simultaneous suppression of necroptotic and apoptotic cell death by miR-105 transfection in hypoxia-stimulated primary cardiomyocytes.** (A) Representative western blot bands showing apoptosis and necroptosis markers. ( $n=4$ ) (B) Band intensities of apoptosis and necroptosis markers. The values given were normalized to the band intensity of  $\beta$ -actin as an internal control. ( $*p<0.05$ ,  $**p<0.01$ ,  $n=3$ ). (C) Effects on cell viability by the inhibitor and anti-miR-105. ( $n=3$ ).

**Supplementary Table S1.** Details for antibodies and primers

| Antibody             | Cat. No.                                                                       | Company                   | Dilutions |        |
|----------------------|--------------------------------------------------------------------------------|---------------------------|-----------|--------|
|                      |                                                                                |                           | For WB    | For IF |
| BAK                  | 12105S                                                                         | Cell Signaling Technology | 1:1000    |        |
| BAX                  | ab32503                                                                        | Abcam                     | 1:1000    |        |
| BNIP3                | ab10433                                                                        | Abcam                     | 1:1000    | 1:100  |
| Caspase-3            | Ab1899                                                                         | MERCK Millipore           | 1:500     | 1:100  |
| Caspase-8            | 9746S                                                                          | Cell Signaling Technology | 1:500     |        |
| <i>p</i> -MLKL       | 91689                                                                          | Cell Signaling Technology | 1:1000    | 1:100  |
| MLKL                 | 14993                                                                          | Cell Signaling Technology | 1:1000    |        |
| RIP3                 | sc-374639                                                                      | Santa Cruz Biotechnology  | 1:500     | 1:100  |
| $\beta$ -actin       | ab8227                                                                         | Abcam                     | 1:2000    |        |
| GAPDH                | sc-47724                                                                       | Santa Cruz Biotechnology  | 1:2000    |        |
| Genes                | Primer sequence (5'-3')                                                        |                           |           |        |
| Bnip3                | Sense strand: GCAGTTGTGTTACGCCTTTATC<br>Antisense strand: GGAGGACGCCTGATTTAACA |                           |           |        |
| Rip3                 | Sense strand: GCTGCTGCTTCCAAGGTA<br>Antisense strand: GCGGTCCAGCATTTCATAAAC    |                           |           |        |
| Gapdh                | Sense strand: GAAAGCCTGCCGGTGACTAA<br>Antisense strand: AGGAAAAGCATCACCCGGAG   |                           |           |        |
| miR-105 (Taqman)     | CAAGUGCUCAGAUGUCUGUGGU                                                         |                           |           |        |
| miR-224-3p (Taqman)  | AAAUGGUGCCCUAGUGACUACA                                                         |                           |           |        |
| miR-291a-5p (Taqman) | CAUCAAAGUGGAGGCCUCUCU                                                          |                           |           |        |
